# Supplementary material
Source: Springer Nature journal article supplement (https://www.springermedizin.de/resource/supplementary/12943_2011_933_MOESM3_ESM.pdf/9551706)

**A.**

|              |   |    |     |     |    |     |    |
|--------------|---|----|-----|-----|----|-----|----|
| EGF (nM)     | - | -  | -   | -   | -  | 1.6 | 16 |
| IGF-I (nM)   | - | -  | -   | 2.6 | 26 | -   | -  |
| Insulin (nM) | - | 10 | 100 | -   | -  | -   | -  |

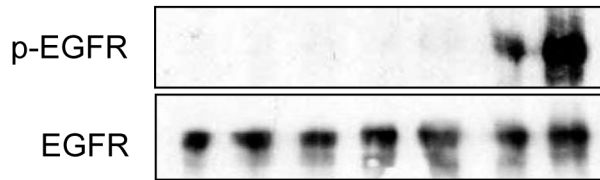

MCF10A

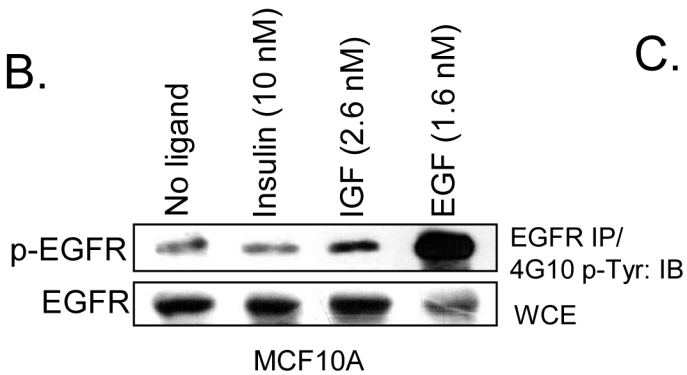

MCF10A

**C.**

|                 |   |   |   |   |
|-----------------|---|---|---|---|
| Insulin (10 nM) | - | + | - | - |
| IGF (2.6 nM)    | - | - | + | - |
| EGF (1.6 nM)    | - | - | - | + |

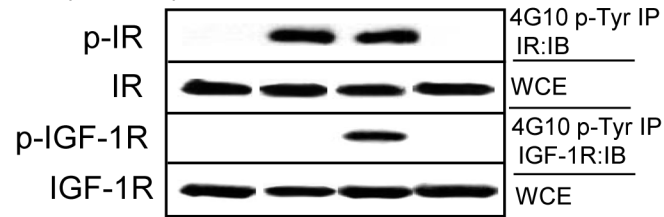

MCF10A

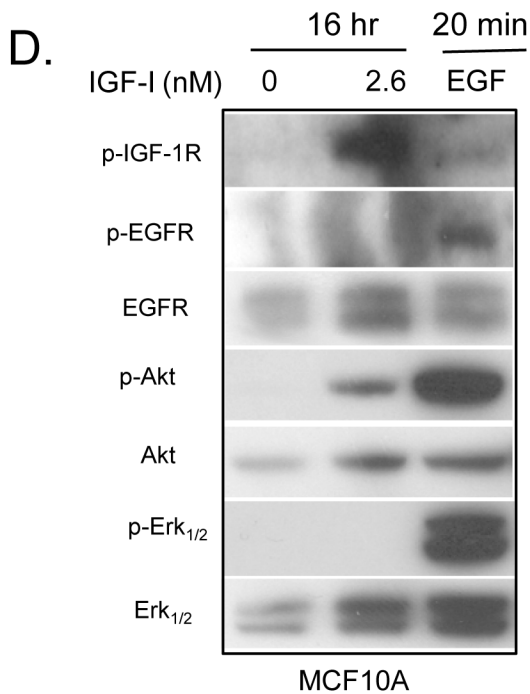

MCF10A

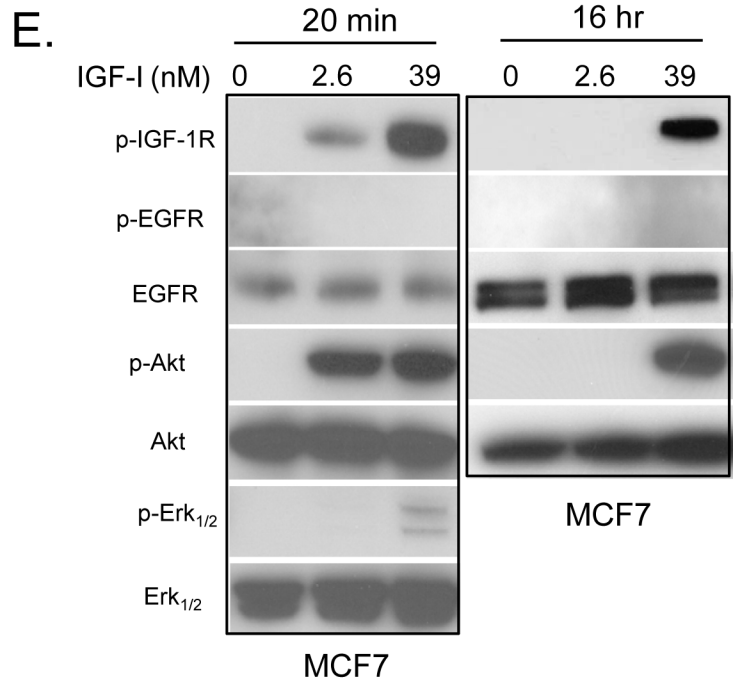

MCF7

MCF7

Supplement: MOESM3 [file 9551706]
